# Supplementary material for: The EEG signature of sensory evidence accumulation during decision formation closely tracks subjective perceptual experience
Source: PubMed Central journal article supplement (PMC6426990; doi:10.1038/s41598-019-41024-4), 2019-03-20
Supplement: 41598_2019_41024_MOESM1_ESM.pdf [file 41598_2019_41024_MOESM1_ESM.pdf]

# **The EEG signature of sensory evidence accumulation during decision formation closely tracks subjective perceptual experience**

Chiara F. Tagliabue<sup>1,2\*†</sup>, Domenica Veniero<sup>3†</sup>, Christopher S. Y. Benwell<sup>4</sup>, Roberto Cecere<sup>3</sup>, Silvia Savazzi<sup>2</sup>, Gregor Thut<sup>3</sup>

<sup>1</sup>CIMeC – Center for Mind/Brain Sciences, University of Trento, Rovereto, Italy

<sup>2</sup>Perception and Awareness (PandA) Laboratory, Department of Neuroscience, Biomedicine and Movement Sciences, University of Verona, Verona, Italy

<sup>3</sup>Centre for Cognitive Neuroimaging, Institute of Neuroscience and Psychology, University of Glasgow, Glasgow, UK

<sup>4</sup>Psychology, School of Social Sciences, University of Dundee, Dundee, UK

<sup>†</sup>These authors contributed equally to this study

## **\*Corresponding author:**

Chiara F. Tagliabue

CIMeC – Center for Mind/Brain Sciences, University of Trento

Corso Bettini 31, 38068, Rovereto, Italy

chiara.tagliabue@unitn.it

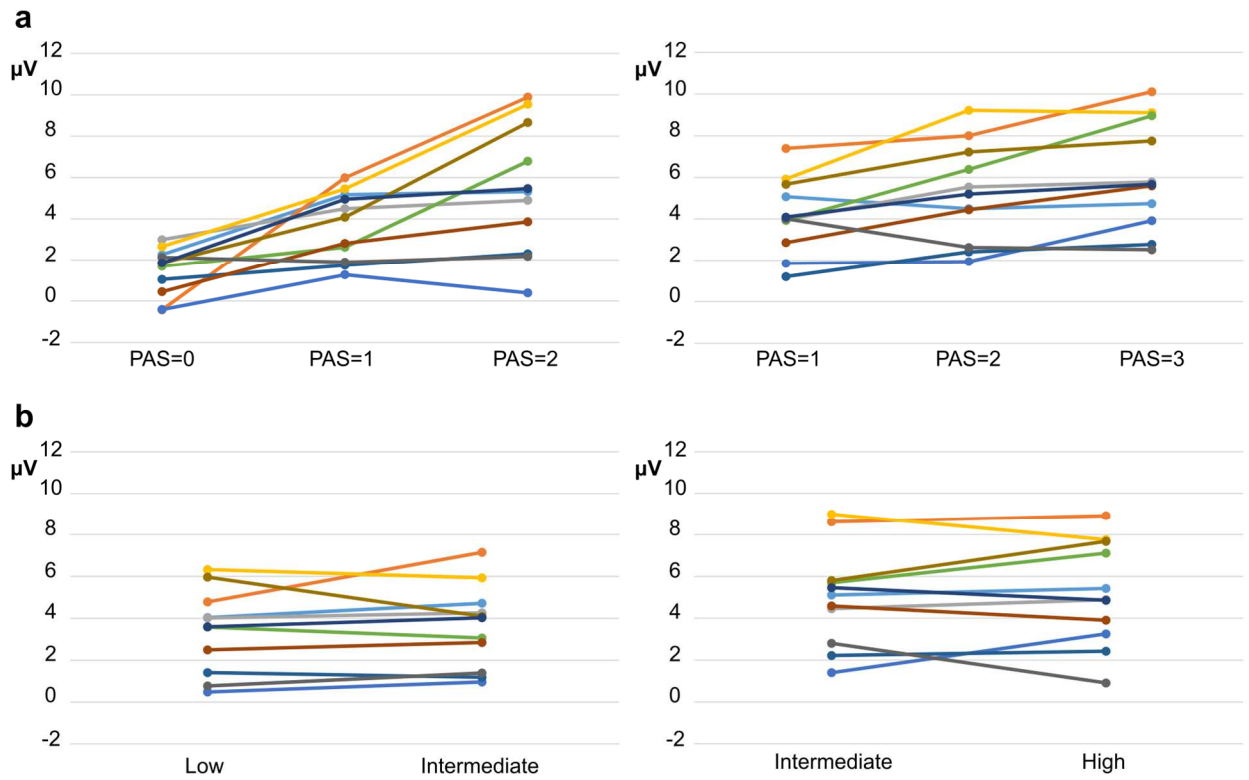

**Supplementary Figure 1.** ERP Data. Single participant data of the mean amplitude for electrode Pz in a 300-700ms time window for each comparison of **(a)** level of subjective evidence (when controlled for stimulus intensity) and **(b)** level of stimulus intensity (when controlled for PAS ratings). The data reveal high consistency across participants for ERP-modulations across PAS levels, and its absence for ERP modulations across intensity levels.
